# Supplementary material for: Methicillin-Resistant Staphylococcus aureus Eradication and Decolonization in Children Study (Part 1): Development of a Decolonization Toolkit With Patient and Parent Advisors
Source: PubMed Central journal article supplement (PMC7434080; doi:10.2196/14974), 2020-05-20

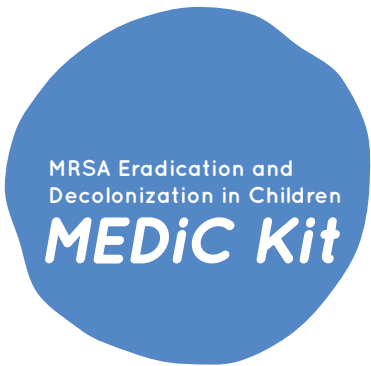

# Supplies you should've received:

## bleach

This should have (or will) come in a shipment by itself. Remember to keep bleach (and all cleaning supplies) away from children.

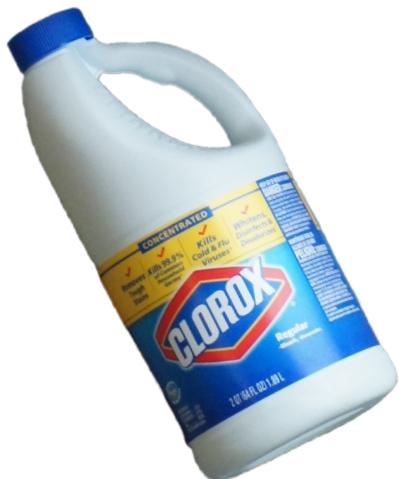

## instruction book

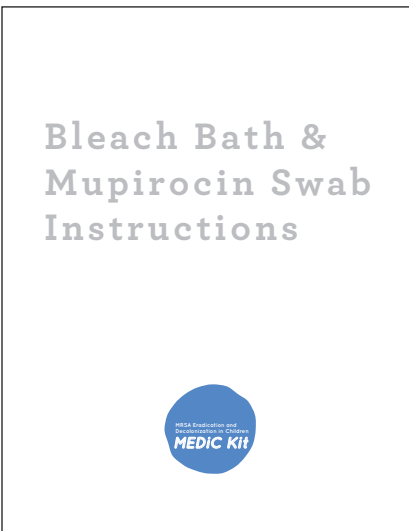

## mupirocin ointment

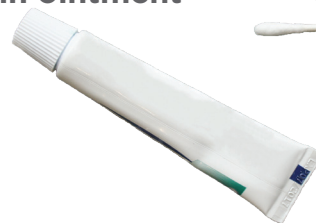

## q-tips

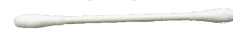

## wax crayon

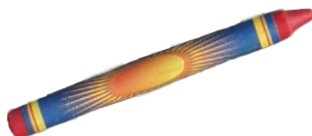

## large measuring cup

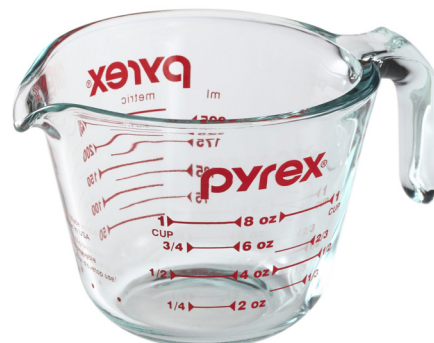

## small measuring cup

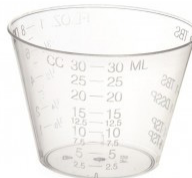

## tracking book

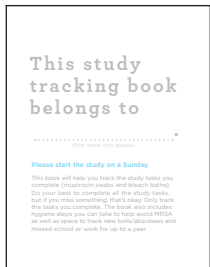

## 3 gallon bucket

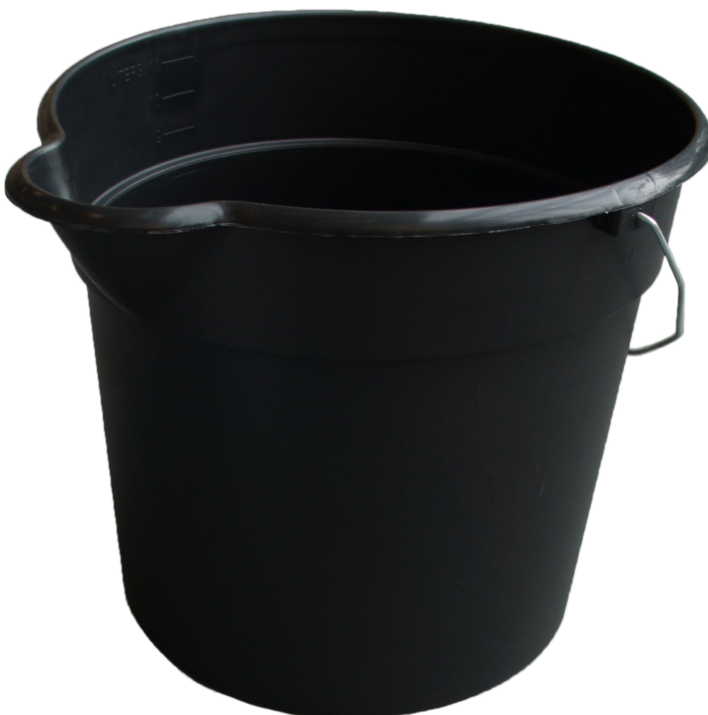

## shower hanger

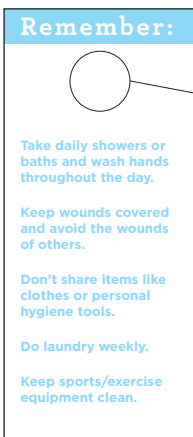

Supplement: jopm_v12i2e14974_app6.pdf [file jopm_v12i2e14974_app6.pdf]
